# Supplementary material for: Identification of the retinoschisin-binding site on the retinal Na/K-ATPase
Source: PubMed Central journal article supplement (PMC6497308; doi:10.1371/journal.pone.0216320), 2019-05-02
Supplement: pone.0216320.s002.pdf [file pone.0216320.s002.pdf]

**S1 Table.** Oligonucleotides applied in expression cloning

| Name                  | 5'-3' Sequence                                                                | Application                                                    |                                                       |
|-----------------------|-------------------------------------------------------------------------------|----------------------------------------------------------------|-------------------------------------------------------|
| hATP1B2-N96Q-F        | GAG AAC CTT GAT GTC ATT GTC CAA GTC AGT<br>GA                                 | Expression<br>cloning of<br>ATP1B2<br>glycosylation<br>mutants |                                                       |
| hATP1B2-N96Q-R        | TCA TGA CTT GGA CAA TGA CAT CAA GGT TCT<br>C                                  |                                                                |                                                       |
| hATP1B2-N118Q-F       | GGA GCC TTA CCA AGA CTC TAT CCA AGC CCA<br>AAA G                              |                                                                |                                                       |
| hATP1B2-N118Q-R       | CTT TTG GGC TTG GAT AGA GTC TTG GTA AGG<br>CTC C                              |                                                                |                                                       |
| hATP1B2-N153Q-F       | CAA ACG TGC CTG CCA ATTCCA ACG GAC CCA<br>G                                   |                                                                |                                                       |
| hATP1B2-N153Q-R       | CTG GGT CCG TTG GAA TTG GCA GGC ACG<br>TTT G                                  |                                                                |                                                       |
| hATP1B2-N159Q-F       | ACC CAG CTG GGC CAA TGC TCC GGC ATT                                           |                                                                |                                                       |
| hATP1B2-N159Q-R       | AAT CCG GAG CAT TGG CCC AGC TGG GT                                            |                                                                |                                                       |
| hATP1B2-N193Q-F       | CCG GGT CAT CAA CTT CTA TGC AGG AGC<br>ACA ACA GAG CAT GAA TG                 |                                                                |                                                       |
| hATP1B2-N193Q-R       | CAT TCA TGC TCT GTT GTG CTC CTG CAT AGA<br>AGT TGA TGA CCC GG                 |                                                                |                                                       |
| hATP1B2-N197Q-F       | CAA ACC AGA GCA TGC AAG TTA CCT GTG CTG                                       |                                                                |                                                       |
| hATP1B2-N197Q-R       | CAG CAC AGG TAA CTT GCA TGC TCT GGT TTG                                       |                                                                |                                                       |
| hATP1B2-N238Q-F       | AAA AGT TCC ACG TGC AAG ACA CAC AGC CC                                        |                                                                |                                                       |
| hATP1B2-N238Q-R       | GGG CTG TGT GTC TTG CAC GTG GAA CTT TT                                        |                                                                |                                                       |
| hATP1B2-N250Q-F       | CTG TGA AGT TCC TGC AAG TGA CCC CCA<br>ACG                                    |                                                                |                                                       |
| hATP1B2-N250Q-R       | CGT TGG GGG TCA CTT GCA GGA ACT TCA<br>CAG                                    |                                                                |                                                       |
| RS1_R141H_F           | ACC CAG GGG CAC TGT GAC ATC                                                   |                                                                | Expression<br>cloning of<br>RS1-R141H                 |
| RS1_R141H_R           | GAG GAT CCC TGA AAT CAC TTT G                                                 |                                                                |                                                       |
| hATP1B2_PatchI_Reg1_F | CCG GCC TTG GGG ACT CCA CCC ACT ATG G                                         |                                                                | Expression<br>cloning of<br>ATP1B2<br>patch I mutants |
| hATP1B2_PatchI_Reg1_R | AGC AGT TGC CCA GCT GGG TCC GGT TGA A                                         |                                                                |                                                       |
| hATP1B2_PatchI_Reg2_F | TGT ACT GGG AAG CGA GAT GAA GAT GCTG                                          |                                                                |                                                       |
| hATP1B2_PatchI_Reg2_R | TTG AAC ATT CAT GCT CTG GTT TGC TCC T                                         |                                                                |                                                       |
| hATP1B2_PatchI_Reg3_F | TTC ACG AAT GTG ACC CCC AAC GTG GAG                                           |                                                                |                                                       |
| hATP1B2_PatchI_Reg3_R | CTG CACAGC CAC CAG GGG CTG TGT GTAG                                           |                                                                |                                                       |
| hATP1B2_PatchI_Reg4_R | AGT ACT CCA CGT TGC CGA GAT TCT CAG CAT<br>CTT CAT CT                         |                                                                |                                                       |
| hATP1B2-start_KpnI_F  | CCC GGT ACC ATG GTC ATC CAG AAA GAG<br>AAG                                    |                                                                |                                                       |
| hATP1B2_PatchI_Reg4_F | AGT ACT TCG GCC TGG GCA ACA GCC CCA<br>ACA TCG ACC TCA TGT ACT TCC CCT ACT AT |                                                                |                                                       |
| hATP1B2-stop_XhoI_R   | CTC GAG GGT TTT GTT GAT GCG GAG TTT GA                                        |                                                                |                                                       |

| Name                    | 5'-3' Sequence                                           | Application                                                                    |
|-------------------------|----------------------------------------------------------|--------------------------------------------------------------------------------|
| hATP1B2_PatchII_Reg1_F  | CCT CAG ATC GAG AAC CTT GAT GTC ATT GTC<br>AAT GTC AGT G | Expression<br>cloning of<br>ATP1B2<br>patch II mutants                         |
| hATP1B2_PatchII_Reg1_R  | AAT CTG TGT CAA GCC CGG TGT GGC CAG                      |                                                                                |
| hATP1B2_PatchII_Reg2_1F | AGT TAG GTT CTT GGA GCC TTA CAA CG                       |                                                                                |
| hATP1B2_PatchII_Reg2_1R | ATGTTC AGA ACA TGC TGG TCC CAG CT                        |                                                                                |
| hATP1B2_PatchII_Reg2_2F | CAA AGA CTC TAT CCA AGC CCA AAA G                        |                                                                                |
| hATP1B2_PatchII_Reg2_2R | CAA AGA CTC TGC CCA AGC CCA AAA G                        |                                                                                |
| hATP1B2_PatchII_Reg2_3F | CAA AGA CTC TGC CCA AGC CCA AAA G                        |                                                                                |
| hATP1B2_PatchII_Reg2_3R | TAC TTC TCC AAGAAC CTA AC                                |                                                                                |
| hATP1B2_PatchII_Reg3_3F | AAC CGA GTC ATC AAC TTC TAT GCA G                        |                                                                                |
| hATP1B2_PatchII_Reg3_3R | GAG CTT GAT GAA GAC ACA GGG CTG                          |                                                                                |
| hATP1B2_PatchII_Reg4_F  | CGT GAA CTA CCT GCA GCC CCT GG                           |                                                                                |
| hATP1B2_PatchII_Reg4_R  | TGG AAC TTT TTG CCA TAG                                  |                                                                                |
| hATP1B2_T240A_F         | CGT GAA CTA C GC ACA GCC CCT GG                          |                                                                                |
| hATP1B2_T240A_R         | TGG AAC TTT TTG CCA TAG TAG GGG                          |                                                                                |
| hATP1B2_T240S_F         | CGT GAA CTA CTC ACA GCC CCT GG                           |                                                                                |
| hATP1B2_T240S_R         | TGGAAC TTTTGGCCATAGTAGGG                                 |                                                                                |
| hATP1B2-KpnI-F          | GGTACCATGGTCATCCAGAAAGAGAAGAA                            | Expression<br>cloning of<br>ATP1B2 and<br>ATP1A3 for<br>biscistronic<br>vector |
| hATP1B2-XhoI-R          | CTC GAG TCA GGT TTT GTT GAT GCG GAG T                    |                                                                                |
| hATP1A3-NotI-F          | GCG GCC GCA TGG GGG ACA AGA AAG ATG<br>ACA A             |                                                                                |
| hATP1A3-BamHI-R         | GGA TCC CTG GCT GAC GGG AAT GTT G                        |                                                                                |
